# Supplementary material for: CH/π-interaction-driven self-assembly of tetraphenylethylene derivatives into the face to face arrangement
Source: Royal Society of Chemistry journal article supplement (doi:10.1039/d0ra10572d), 2021-01-01
Supplement: d0ra10572d1.pdf [file d0ra10572d1.pdf]

## Supporting Information

### CH/ $\pi$ -Interaction-Driven Self-Assembly of Tetraphenylethylene Derivatives into the Face to Face Arrangement

Lirong Yu, ‡<sup>a</sup> Mengxing Zhang, ‡<sup>a</sup> Dandan Lou, <sup>a</sup> Jiale Li, <sup>a</sup> Xi Wang\*<sup>a</sup> and Ming Bai \*<sup>a,b</sup>

---

<sup>a</sup> Marine College, Shandong University, Weihai, Weihai 264209, People's Republic of China. E-mail:  
xi\_wang@sdu.edu.cn; ming\_bai@sdu.edu.cn;

<sup>b</sup> SDU-ANU Joint Science College, Shandong University, Weihai, Weihai 264209, People's Republic of  
China.

‡ These authors contributed equally to this work.

**Fig. S1.** Uv-vis spectra of **TPEC4** in DMSO-H<sub>2</sub>O mixtures with different water fractions. Concentration: 50  $\mu$ M. The absorbance spectra of **TPEC4** at  $f_w = 55, 60\%$  are not normal which may attribute to the particles formed in these situations make the scattering greater than the absorption.

**Fig. S2.** Fluorescence spectra of **TPEC4** in DMSO-H<sub>2</sub>O mixtures with different water fractions in which the water was added continuously. (A) Fluorescence spectra and (B) plots of the fluorescence intensity at maximum emission of **TPEC4** in DMSO in different concentration (Concentration: from 0.5 to 800  $\mu$ M).

**Fig. S3.** Uv-vis spectra of **TPEC4** in DMSO-H<sub>2</sub>O mixtures with different water fractions in which the water was added continuously. Concentration: 100-10  $\mu$ M. The absorbance spectra of **TPEC4** at  $f_w > 40\%$  are not normal which may attribute to the particles formed in these situations make the scattering greater than the absorption.

**Fig. S4.** The rule for nomination of the two conformational enantiomers of **TPEC4**. The compounds possess propeller-shaped chirality (*P* and *M*) for achiral TPE twisting in one direction.

**Fig. S5.** The definition of the dihedral angles formed between the phenyl rings and the C=C bond.

**Fig. S6.** The intramolecular hydrogen bonding displayed in **TPEC4-THF** crystal. Blue and purple colored **TPEC4-THF** represent a pair of conformational enantiomers.

**Fig. S7.** The intramolecular/ intermolecular interaction (C-H $\cdots$ O hydrogen bonds) displayed in **TPEC4-DCM** crystal. Purple and yellow colored **TPEC4-DCM** represent a pair of conformational enantiomers.

**Fig. S8.** The XRD pattern of the particles obtained from  $f_w=90\%$  (DMSO-H<sub>2</sub>O) compared with the simulated XRD pattern of **TPEC4-THF** and **TPEC4-DCM**. The dot and asterisk assigned to the peaks in **TPEC4-THF** and **TPEC4-DCM** respectively.

**Table S1.** Crystallographic data of **TPEC4-THF** and **TPEC4-DCM**.

**Table S2.** The dihedral angles between the phenyl moieties and the C=C bond of **TPEC4-THF** and **TPEC4-DCM** with *P* conformation.

**Table S3.** The sample preparation for the **TPEC4** in DMSO-H<sub>2</sub>O mixtures with different water fractions in which the water was added continuously (the stock solution is 100  $\mu$ M,  $f_w = 0\%$ ).

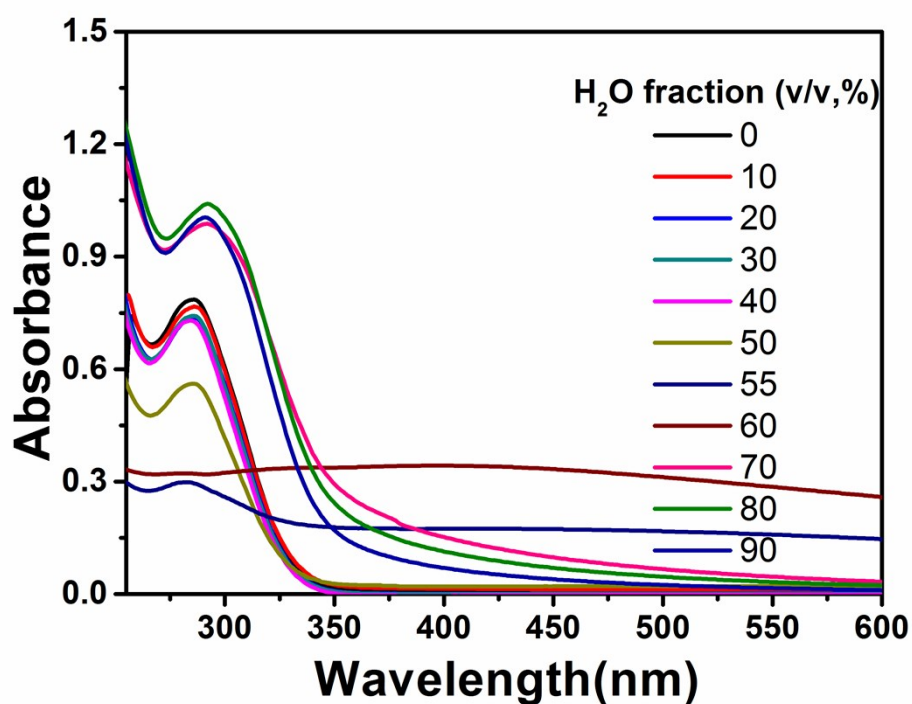

**Fig. S1.** Uv-vis spectra of TPEC4 in DMSO-H<sub>2</sub>O mixtures with different water fractions. Concentration: 50  $\mu$ M. The absorbance spectra of TPEC4 at  $f_w = 55, 60\%$  are not normal which may attribute to the particles formed in these situations make the scattering greater than the absorption.

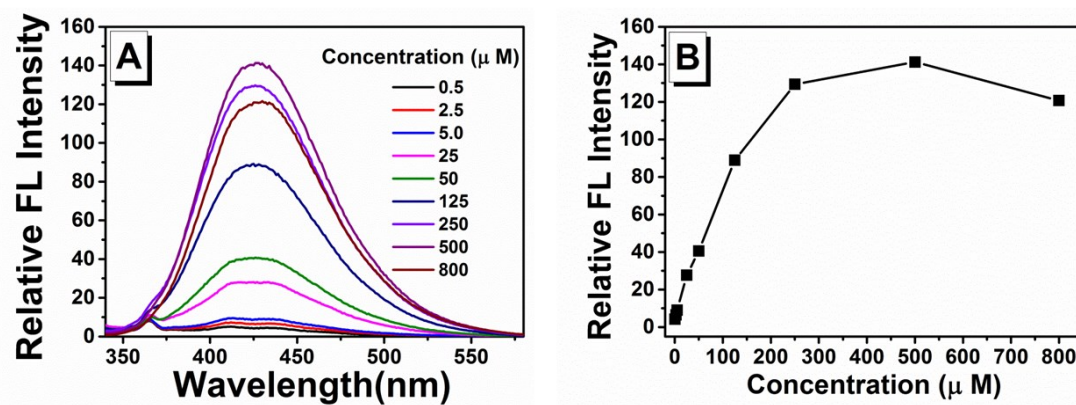

Fig. S2. Fluorescence spectra of TPEC4 in DMSO-H<sub>2</sub>O mixtures with different water fractions in which the water was added continuously. (A) Fluorescence spectra and (B) plots of the fluorescence intensity at maximum emission of TPEC4 in DMSO in different concentration (Concentration: from 0.5 to 800  $\mu\text{M}$ ).

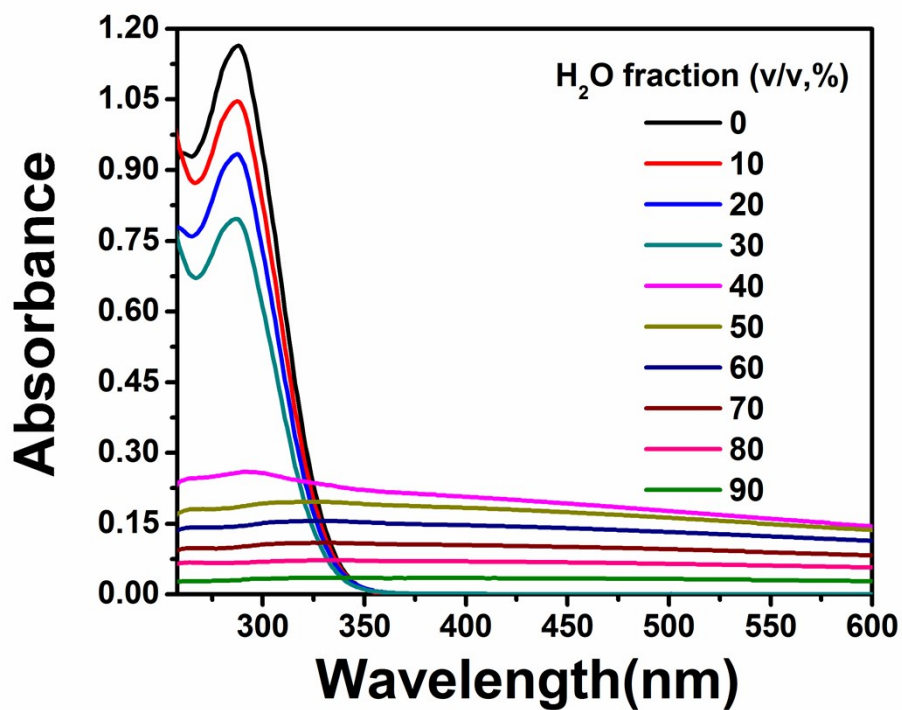

**Fig. S3.** Uv-vis spectra of TPEC4 in DMSO-H<sub>2</sub>O mixtures with different water fractions in which the water was added continuously. Concentration: 100-10  $\mu$ M. The absorbance spectra of TPEC4 at  $f_w > 40\%$  are not normal which may attribute to the particles formed in these situations make the scattering greater than the absorption.

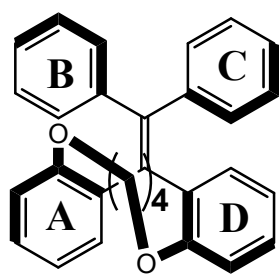

**M-TPE**

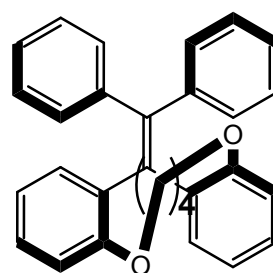

**P-TPE**

**Fig. S4.** The rule for nomination of the two conformational enantiomers of **TPEC4**. The compounds possess propeller-shaped chirality (*P* and *M*) for achiral TPE twisting in one direction.

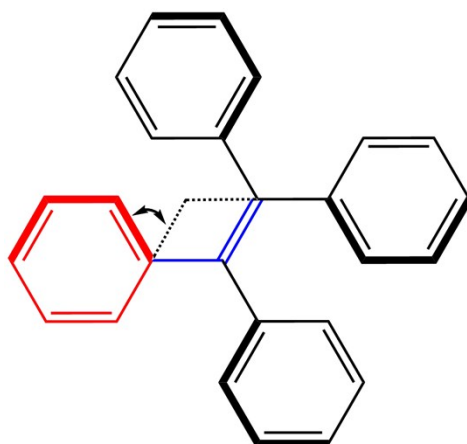

**Fig. S5.** The definition of the dihedral angles formed between the phenyl rings and the C=C bond.

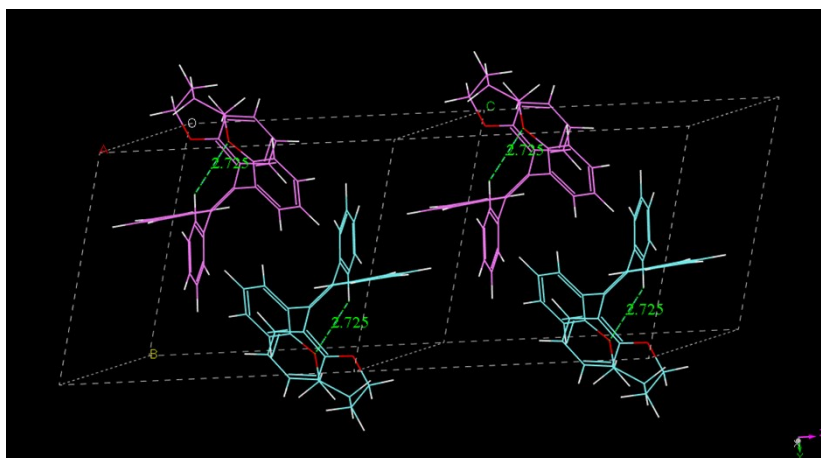

**Fig. S6.** The intramolecular hydrogen bonding displayed in **TPEC4-THF** crystal. Blue and purple colored **TPEC4-THF** represent a pair of conformational enantiomers.



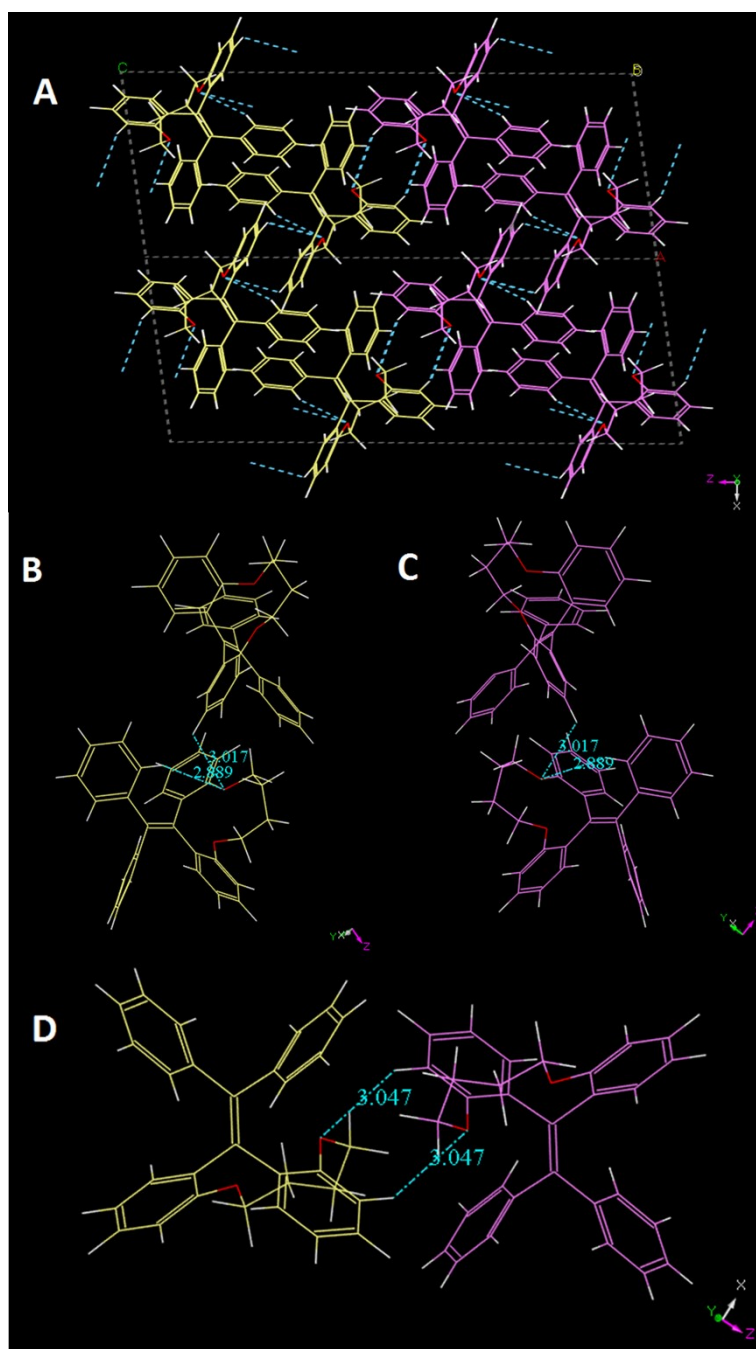

**Fig. S7.** The intramolecular/ intermolecular interaction (C-H...O hydrogen bonds) displayed in TPEC4-DCM crystal. Purple and yellow colored TPEC4-DCM represent a pair of conformational enantiomers.

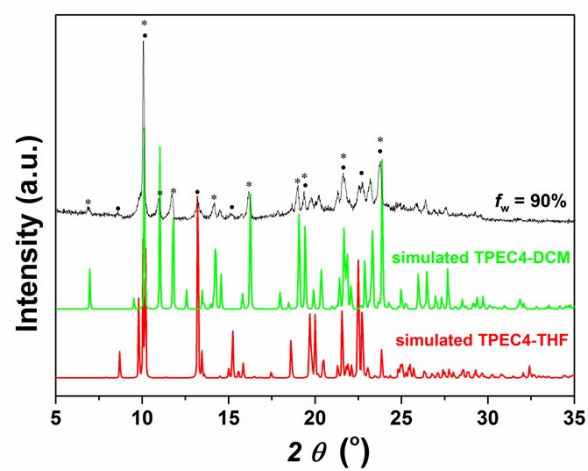

**Fig. S8.** The XRD pattern of the particles obtained from  $f_w=90%$  (DMSO-H<sub>2</sub>O) compared with the simulated XRD pattern of TPEC4-THF and TPEC4-DCM. The dot and asterisk assigned to the peaks in TPEC4-THF and TPEC4-DCM respectively.

**Table S1** Crystallographic data of **TPEC4-THF** and **TPEC4-DCM**.

| Code                                                          | TPEC4-THF                                      | TPEC4-DCM                                      |
|---------------------------------------------------------------|------------------------------------------------|------------------------------------------------|
| Temperature(K)                                                | 293(2)                                         | 296(2)                                         |
| Chemical formula                                              | C <sub>30</sub> H <sub>26</sub> O <sub>2</sub> | C <sub>30</sub> H <sub>26</sub> O <sub>2</sub> |
| Crystal system                                                | Triclinic                                      | Monoclinic                                     |
| Space group                                                   | <i>P</i> -1                                    | <i>P</i> 2 <sub>1</sub> /c                     |
| Formula weight                                                | 418.54                                         | 418.54                                         |
| <i>a</i> (Å)                                                  | 9.6474(7)                                      | 9.3824(12)                                     |
| <i>b</i> (Å)                                                  | 10.8318(6)                                     | 9.3181(12)                                     |
| <i>c</i> (Å)                                                  | 12.4029(9)                                     | 25.644(3)                                      |
| $\alpha$ (°)                                                  | 103.244(6)                                     | 90.00                                          |
| $\beta$ (°)                                                   | 108.679(7)                                     | 97.845(4)                                      |
| $\gamma$ (°)                                                  | 100.155(6)                                     | 90.00                                          |
| Volume (Å <sup>3</sup> )                                      | 1150.52(15)                                    | 2221.0(5)                                      |
| <i>D</i> <sub>c</sub> (gcm <sup>-3</sup> )                    | 1.208                                          | 1.252                                          |
| <i>F</i> (000)                                                | 444                                            | 888                                            |
| <i>Z</i>                                                      | 2                                              | 4                                              |
| $\mu$ (mm <sup>-1</sup> )                                     | 0.577                                          | 0.077                                          |
| <i>R</i> <sub>1</sub> [ <i>I</i> > 2 $\sigma$ ( <i>I</i> )]   | 0.0482                                         | 0.0731                                         |
| <i>R</i> <sub>1</sub> (all data)                              | 0.0575                                         | 0.1177                                         |
| w <i>R</i> <sub>2</sub> [ <i>I</i> > 2 $\sigma$ ( <i>I</i> )] | 0.1436                                         | 0.1638                                         |
| w <i>R</i> <sub>2</sub> (all data)                            | 0.1559                                         | 0.1806                                         |
| GOF                                                           | 1.046                                          | 1.030                                          |

**Table S2.** The dihedral angles between the phenyl moieties and the C=C bond of **TPEC4-THF** and **TPEC4-DCM** with *P* conformation.

| <b>Compound</b>  | <b>A</b>     | <b>B</b>     | <b>C</b>     | <b>D</b>     |
|------------------|--------------|--------------|--------------|--------------|
| <b>TPEC4-THF</b> | 68.978(72)°  | 38.071(106)° | 52.733(79)°  | 62.796(101)° |
| <b>TPEC4-DCM</b> | 65.745(246)° | 34.278(204)° | 59.172(237)° | 69.776(227)° |

**Table S3.** The sample preparation for the TPEC4 in DMSO-H<sub>2</sub>O mixtures with different water fractions in which the water was added continuously (the stock solution is 100  $\mu$ M,  $f_w = 0\%$ )

|    | <b>DMSO (mL)</b> | <b>Adding<br/>H<sub>2</sub>O(mL)</b> | <b>H<sub>2</sub>O (mL)</b> | <b>H<sub>2</sub>O fraction<br/>(v/v)</b> | <b>Concentration<br/>(<math>\mu</math>M)</b> |
|----|------------------|--------------------------------------|----------------------------|------------------------------------------|----------------------------------------------|
| 1  | 5                | 0                                    | 0                          | 0                                        | 100                                          |
| 2  | 5                | 0.556                                | 0.556                      | 10                                       | 90                                           |
| 3  | 5                | 0.694                                | 1.25                       | 20                                       | 80                                           |
| 4  | 5                | 0.893                                | 2.143                      | 30                                       | 70                                           |
| 5  | 5                | 1.19                                 | 3.333                      | 40                                       | 60                                           |
| 6  | 5                | 1.667                                | 5                          | 50                                       | 50                                           |
| 7  | 5                | 2.5                                  | 7.5                        | 60                                       | 40                                           |
| 8  | 5                | 4.167                                | 11.667                     | 70                                       | 30                                           |
| 9  | 5                | 8.333                                | 20                         | 80                                       | 20                                           |
| 10 | 5                | 25                                   | 45                         | 90                                       | 10                                           |
